# Supplementary material for: Contribution of the CK2 Catalytic Isoforms α and α’ to the Glycolytic Phenotype of Tumor Cells
Source: Cells. 2021 Jan 18;10(1):181. doi: 10.3390/cells10010181 (PMC7831337; doi:10.3390/cells10010181)
Supplement: Supplementary file 1 [file cells-10-00181-s001.pdf]

**A**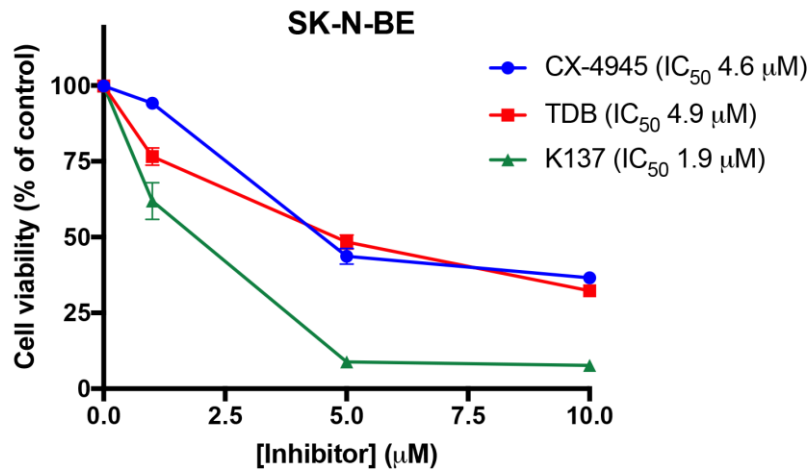**B**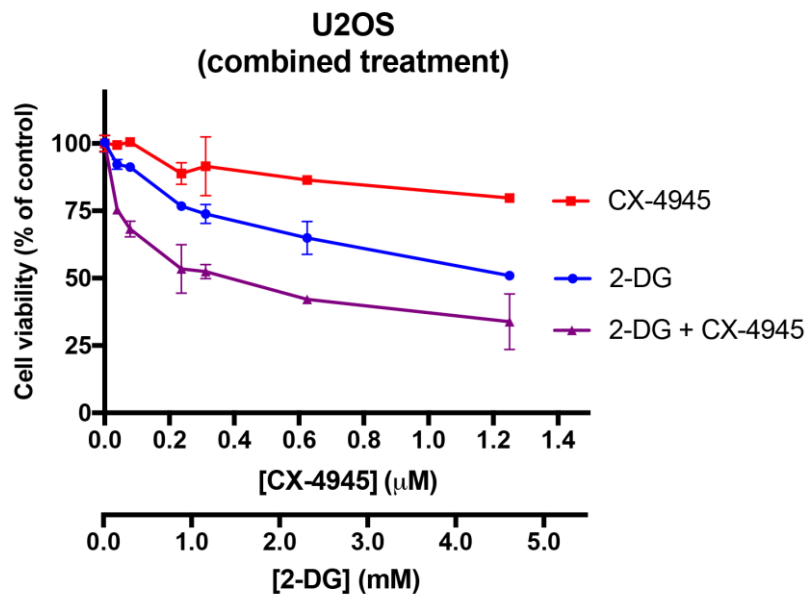

|                    | $\text{IC}_{50}$<br>CX-4945 ( $\mu\text{M}$ ) | $\text{IC}_{50}$<br>2-DG (mM) |
|--------------------|-----------------------------------------------|-------------------------------|
| Single treatment   | > 1.25                                        | > 5.0                         |
| Combined treatment | 0.386                                         | 1.54                          |

**Figure S1.** Effect of CK2 inhibitors on cell viability. Cell viability, measured by the MTT method, is shown as percentage of vehicle-treated cells (control). The  $\text{IC}_{50}$  values (concentrations reducing cell viability to 50%) were calculated with the GraphPadPrism 7 software. **(A)** SK-N-BE cells were treated for 48h with increasing concentrations of the CK2 inhibitors CX-4945, TDB, or K137. The  $\text{IC}_{50}$  values are reported on the side of each inhibitor **(B)** U2OS cells were treated for 24 h with increasing concentrations of CX-4945 (upper X-axis), or 2-DG (lower X-axis), or both compounds in the fixed ratio of 1:4000 (CX-4945:2-DG). The table in the bottom reports the  $\text{IC}_{50}$  values for the two compounds, either alone or in combined treatment.
